# Supplementary material for: As Old as the Hills: Montane Scorpions in Southwestern North America Reveal Ancient Associations between Biotic Diversification and Landscape History
Source: PubMed Central journal article supplement (PMC3541388; doi:10.1371/journal.pone.0052822), 2013-01-09

# Multilocus \*BEAST

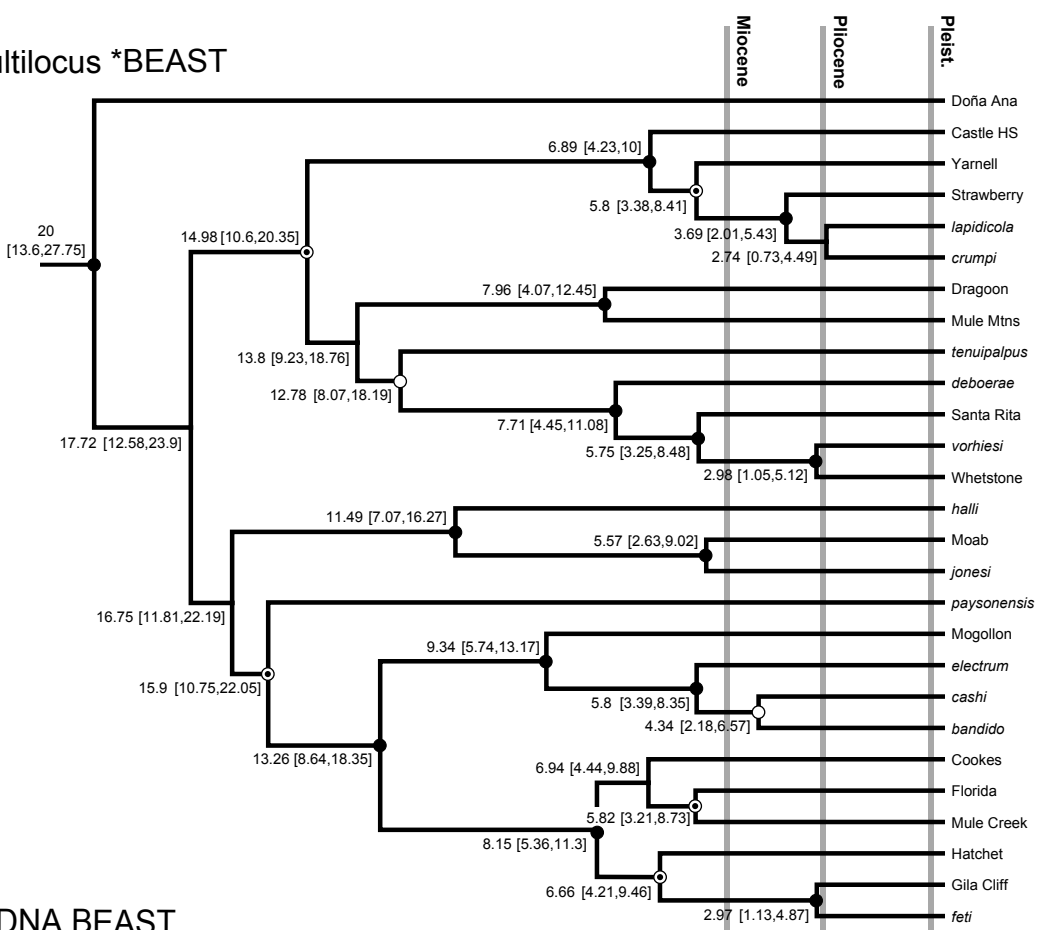

# mtDNA BEAST

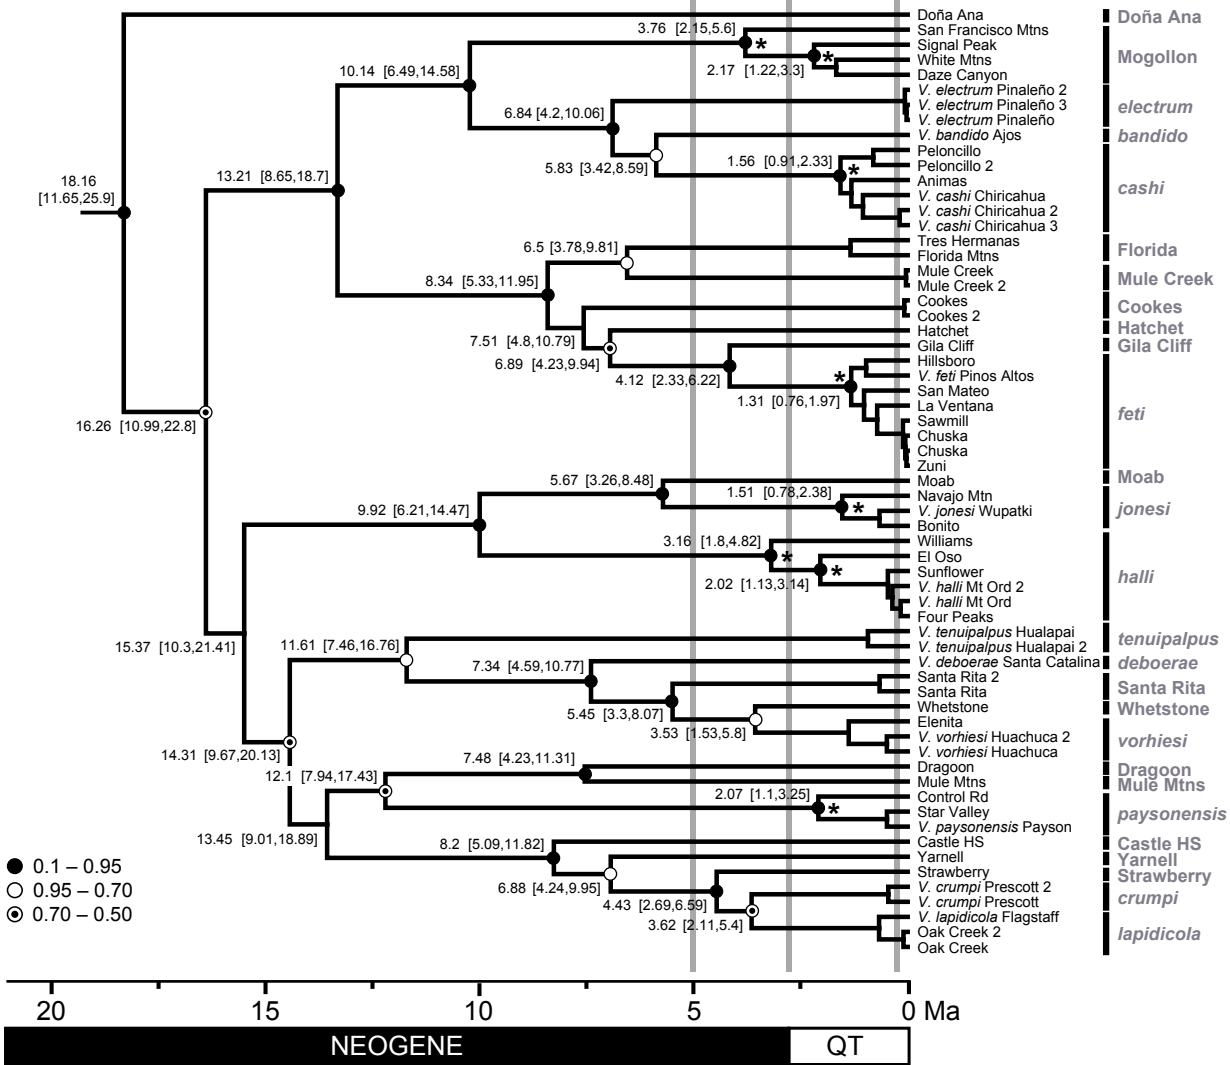

Supplement: pone.0052822.s002.pdf [file pone.0052822.s002.pdf]
